# Supplementary material for: Recruitment of Cytosolic J-Proteins by TOM Receptors Promotes Mitochondrial Protein Biogenesis
Source: PubMed Central journal article supplement — Cell Rep. 2018 Nov 20;25(8):2036–2043.e5. doi: 10.1016/j.celrep.2018.10.083 (PMC6280124; doi:10.1016/j.celrep.2018.10.083), 2018-11-20
Supplement: mmc1.pdf [file mmc1.pdf]

**Cell Reports, Volume 25**

## **Supplemental Information**

### **Recruitment of Cytosolic J-Proteins by TOM Receptors Promotes Mitochondrial Protein Biogenesis**

**Łukasz Opaliński, Jiyao Song, Chantal Priesnitz, Lena-Sophie Wenz, Silke Oeljeklaus, Bettina Warscheid, Nikolaus Pfanner, and Thomas Becker**

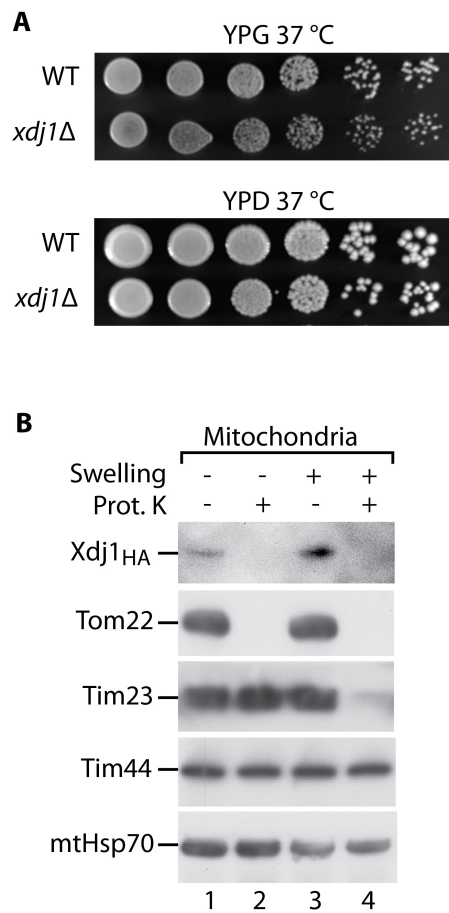

**Figure S1. Growth of *xdj1*Δ Cells and Localization of Xdj1, Related to Figure 1**

(A) Serial dilutions of wild-type (WT) and *xdj1*Δ cells were spotted on full medium containing a fermentable (glucose, YPD) or non-fermentable (glycerol, YPG) carbon source. Growth was analyzed at 37°C.

(B) Intact Xdj1<sub>HA</sub> mitochondria or osmotically swollen mitochondria (swelling) were treated with proteinase K (Prot. K) where indicated. Proteins were separated by SDS-PAGE and analyzed by immunodetection with the indicated antisera. Xdj1<sub>HA</sub> was detected with anti-HA antibodies.

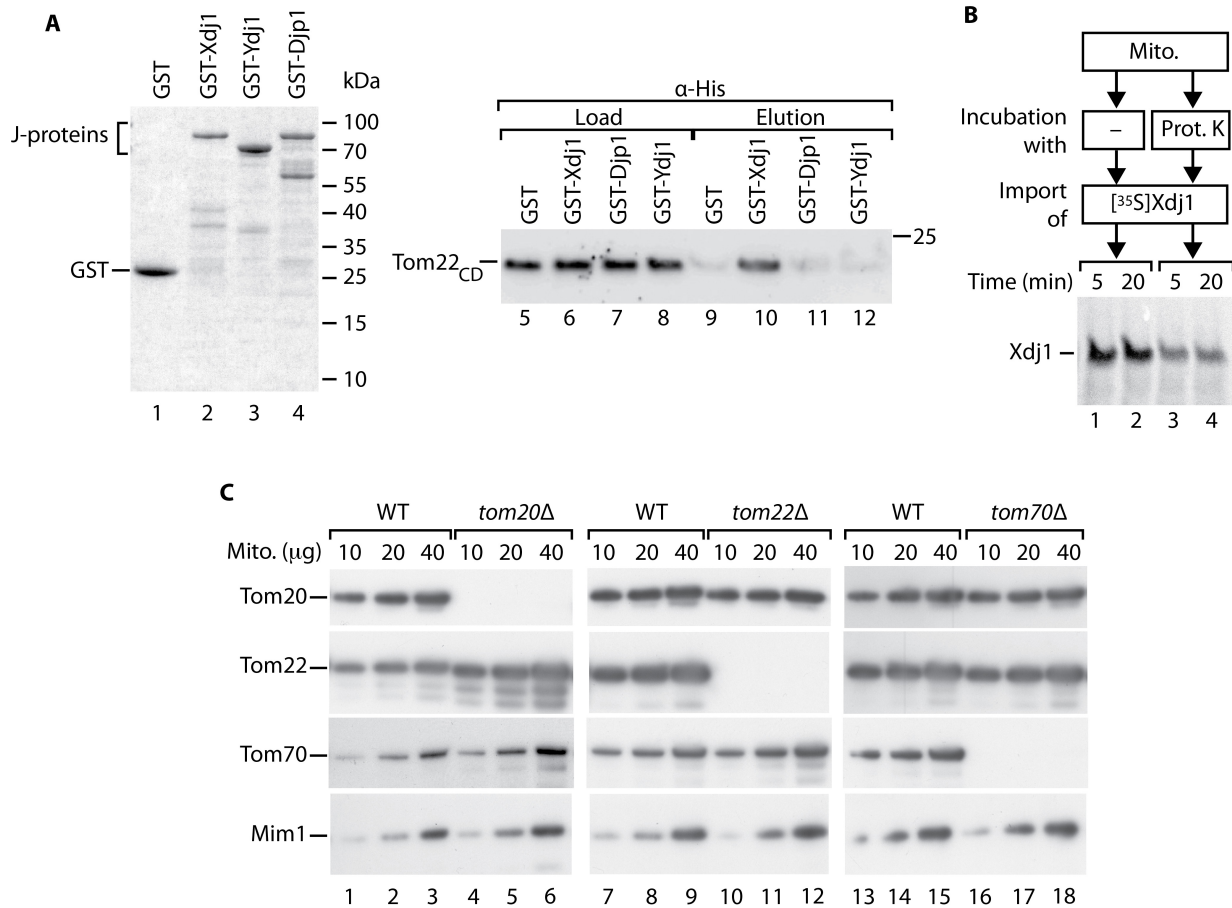

**Figure S2. Analysis of Xdj1 Binding to Tom22 and Characterization of TOM Receptor Mutant Mitochondria, Related to Figure 1**

(A) Left panel, the indicated recombinantly expressed and purified proteins were analyzed by SDS-PAGE and Coomassie blue staining. Right panel, the recombinantly expressed His-tagged cytosolic domain of Tom22 (Tom22<sub>CD</sub>) was incubated with glutathione columns coated with GST, GST-Xdj1, GST-Djp1 or GST-Ydj1. Load and elution fractions were analyzed by SDS-PAGE and immunodetection with anti-His antibodies. Input for Tom22<sub>CD</sub> 2%; elution 100%.

(B) <sup>35</sup>S-labeled Xdj1 was incubated with isolated wild-type mitochondria. Where indicated, mitochondria were treated with proteinase K (Prot. K) before binding of [<sup>35</sup>S]Xdj1.

(C) The indicated protein amounts of wild-type (WT), *tom20Δ*, *tom22Δ* and *tom70Δ* mitochondria were analyzed by SDS-PAGE and immunodetection with the indicated antisera. The lack of Tom20 leads to decreased levels of Tom22; the *tom20Δ* yeast strain used thus additionally contains a plasmid for expression of *TOM22*, leading to a moderate increase of Tom22 levels.

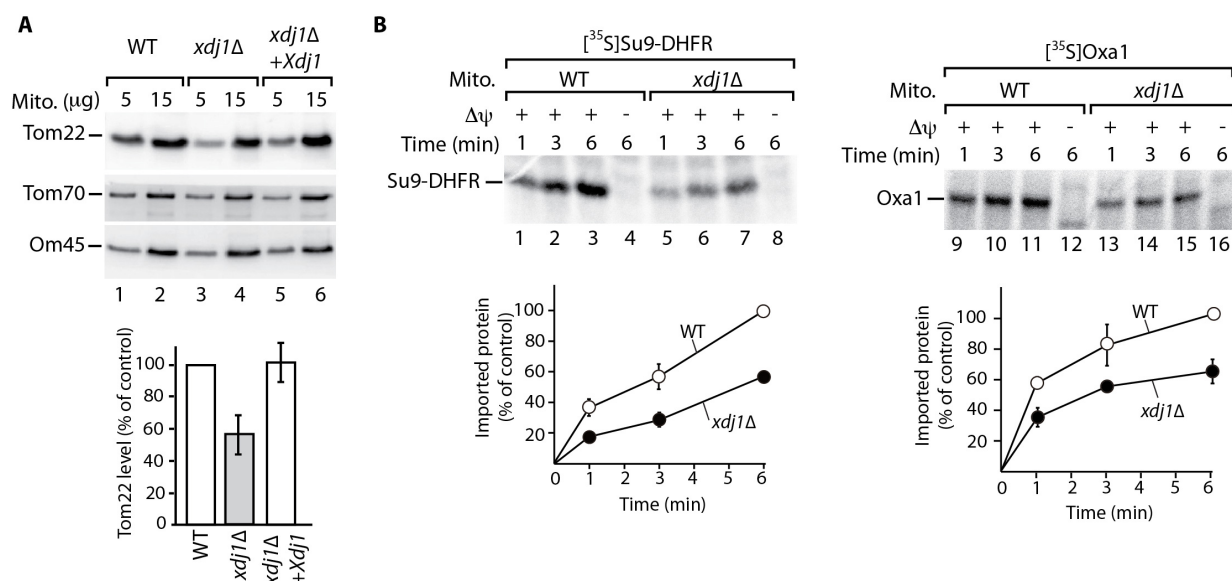

**Figure S3. Characterization of *xdj1Δ* Strain and Mitochondria, Related to Figure 2**

(A) Mitochondria from wild-type (WT), *xdj1Δ* and an *xdj1Δ* strain expressing plasmid-encoded *XDJ1* (*xdj1Δ*+*Xdj1*) were analyzed by SDS-PAGE and immunodetection. Quantification of Tom22 levels, depicted are mean values with standard error of the mean (n = 3). The amount of Tom22 in WT mitochondria was set to 100% (control).

(B) <sup>35</sup>S-labeled precursors of Su9-DHFR or Oxa1 were imported into WT and *xdj1Δ* mitochondria for the indicated periods. After import, non-imported precursor proteins were removed by treatment with proteinase K. The import reactions were analyzed by SDS-PAGE and autoradiography. Quantification of three independent import reactions with standard error of the mean. As control, the import of precursors into WT mitochondria after 6 min was set to 100%. Δψ, membrane potential.

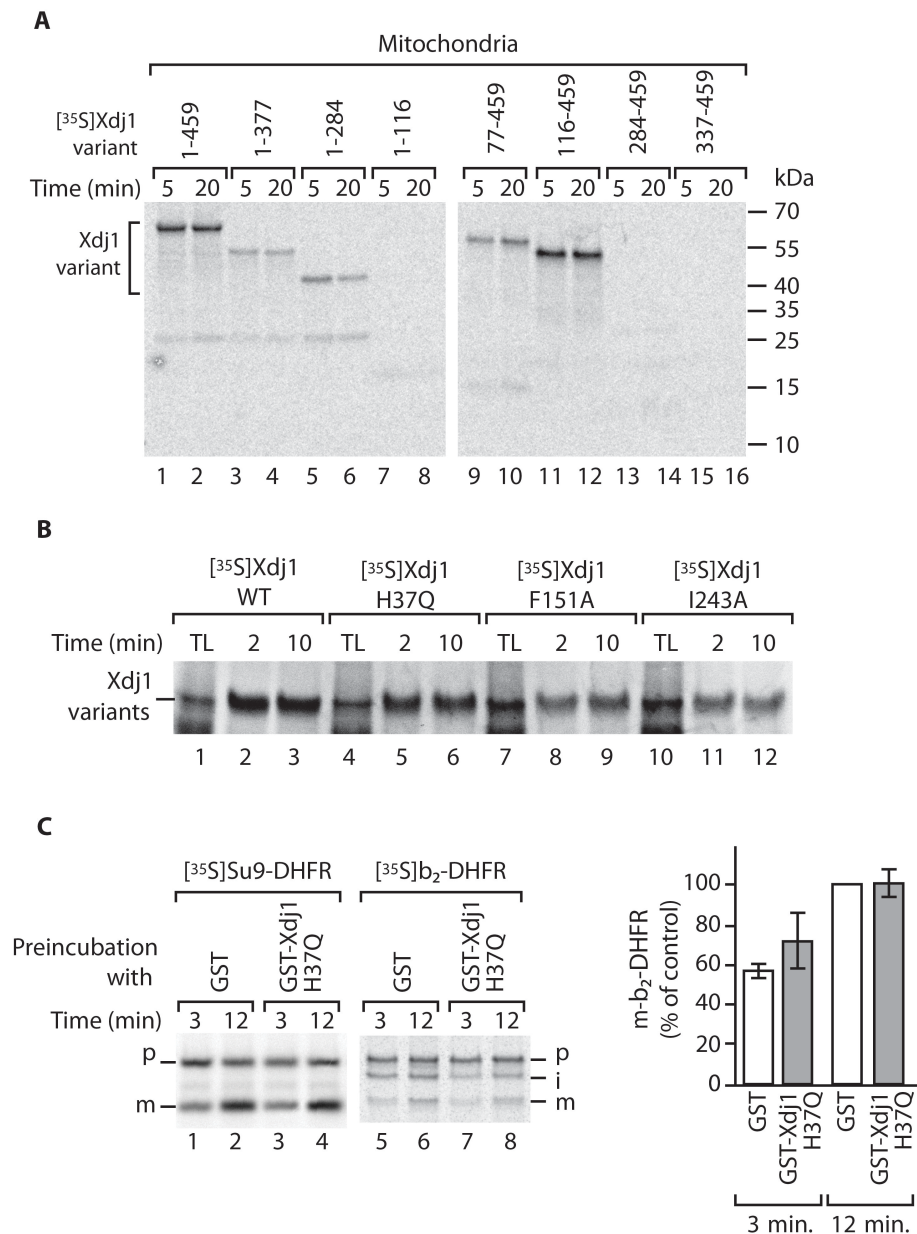

**Figure S4. Analysis of Xdj1 Variants, Related to Figure 4**

(A) <sup>35</sup>S-labeled Xdj1 constructs were incubated with isolated yeast wild-type (WT) mitochondria for the indicated periods. Mitochondria-bound proteins were analyzed by SDS-PAGE and autoradiography.

(B) <sup>35</sup>S-labeled Xdj1 variants were incubated with isolated WT mitochondria for the indicated periods. Mitochondria-bound proteins were analyzed by SDS-PAGE and autoradiography. TL, translation product, 14% of input.

(C) The precursors [<sup>35</sup>S]Su9-DHFR and [<sup>35</sup>S]b<sub>2</sub>-DHFR were incubated with recombinantly expressed and purified GST, GST-Xdj1 or GST-Xdj1H37Q prior to import into isolated WT mitochondria. The import reaction was analyzed by SDS-PAGE and autoradiography. p, precursor; i, intermediate; m, mature. Quantification of mature-sized [<sup>35</sup>S]b<sub>2</sub>-DHFR, mean values with range (n = 2); the import after 12 min in the presence of GST was set to 100% (control).

**Table S1. List of Proteins Identified in Tom22<sub>His</sub> Affinity Purification Experiments, Related to Figure 1**

Identification of proteins purified with Tom22<sub>His</sub> and SILAC-based relative quantification were performed using MaxQuant/Andromeda (version 1.2.0.18). Potential Tom22 interaction partners were defined as proteins with an enrichment factor of  $> 10$ , an overall sequence coverage of  $\geq 4\%$ , and a p-value of  $< 0.05$ . See Excel file for results.

**Table S2. Oligonucleotides Used in This Study, Related to STAR Methods**

| <b>Name</b>       | <b>Sequence (5'-&gt;3')</b>                                    | <b>Source</b> | <b>Identifier</b> |
|-------------------|----------------------------------------------------------------|---------------|-------------------|
| pGEX-XDJ1for      | CGGGATCCCGATGAGTGGCAGTGATAGAGG                                 | This paper    | 1996              |
| pGEX-XDJ1rev      | TCCCCCGGGGGGATCATTGGATACAGCAGTACGAAC                           | This paper    | 1997              |
| pGEX-YDJ1for      | CGGGATCCCGATGGTTAAAGAACTAAGTTTTACGATATTC                       | This paper    | 1998              |
| pGEX-YDJ1rev      | TCCCCCGGGGGGATCATTGAGATGCACATTGAACAC                           | This paper    | 1999              |
| pGEX-DJP1for      | CGGGATCCCGATGGTTGTTGATACTGAGTATTACG                            | This paper    | 2000              |
| pGEX-DJP1rev      | TCCCCCGGGGGGATCATGTATGTCTCTTCTTTTTGTAGC                        | This paper    | 2001              |
| XDJ1H37Qfor       | GCTTACAGAAAGCTTGCCCTGAAACATCAACCGGACAAGTATGTGGATCAAGACTCA      | This paper    | 2002              |
| XDJ1H37Qrev       | TGAGTCTTGATCCACATACTTGTCGGTTGATGTTTCAGGGCAAGCTTTCTGTAAGC       | This paper    | 2003              |
| XDJ1-HAfor        | AGCGCATCAGAAAGCAAGAAGTTCGTA CTGCTGTATCCAACGGATCCCCGGGTTAATTAA  | This paper    | 2004              |
| Xdj1-HArev        | GAAAAAAAAAAAAAAAAATAGAATAAAAAGTTATTGATGCCAGAATTCGAGCTCGTTTAAAC | This paper    | 2005              |
| SP6-XDJ1for       | TCGATTTAGGTGACACTATAGAATACGCCGCCGCCATGAGTGGCAGTGATAGAGGAG      | This paper    | 1326              |
| SP6-XDJ1Rev       | GATCTCATTGGATACAGCAGTACGAAC                                    | This paper    | 1327              |
| SP6-OXA1for       | TCGATTTAGGTGACACTATAGAATACGCCGCCGCCATGTTCAAACCTCACCTCTCGAC     | This paper    | 1334              |
| SP6-OXA1rev       | GATCTCATTTTTTGTATTATAATGAAGTTTG                                | This paper    | 1335              |
| SP6-TOM22for      | TCGATTTAGGTGACACTATAGAATACGCCGCCGCCATGGTTCGAATTAAGTAAAGACG     | This paper    | 1322              |
| SP6-TOM22rev      | GATCTTAATTGGCTGTTGCTGCAG                                       | This paper    | 1323              |
| CCXDJ1-GFPfor     | ATATCTAGAATGAGTGGCAGTGATAGAGGAG                                | This paper    | 2006              |
| CCXDJ1-gfprev     | TTGTCGACTTGGATACAGCAGTACGAACTTC                                | This paper    | 2007              |
| SP6-XDJ177-458for | TCGATTTAGGTGACACTATAGAATACGCCGCCGCCATGGGTGATGATAATGGTGCCGCT    | This paper    | 2008              |

|                       |                                                                 |               |      |
|-----------------------|-----------------------------------------------------------------|---------------|------|
| SP6-XDJ<br>116-458for | TCGATTTAGGTGACACTATAGAATACGCCGCC<br>GCCATGGGCGAGTATGATGCGTACGAA | This<br>paper | 2009 |
| SP6-XDJ<br>284-458for | TCGATTTAGGTGACACTATAGAATACGCCGCC<br>GCCATGGAAACTTGGAGCAGAAGCAA  | This<br>paper | 2010 |
| SP6-XDJ<br>377-458for | TCGATTTAGGTGACACTATAGAATACGCCGCC<br>GCCATGCCACCAGATAACTGGTTCAAT | This<br>paper | 2011 |
| SP6-XDJ<br>1-377rev   | GATCTCATGGAAATTCAATATGAACGAA                                    | This<br>paper | 2012 |
| SP6-XDJ<br>1-284rev   | GATCTCATTCTTGTTTTTCAGTGAGATG                                    | This<br>paper | 2013 |
| SP6-XDJ<br>1-116rev   | GATCTCAGCCAGGGAAATTATTTCCATC                                    | This<br>paper | 2014 |
| XDJ1WG<br>for         | CTTTAAGAAGGAGATATAACCATGAGTGGCAGT<br>GATAGA                     | This<br>paper | 2015 |
| XDJ1WG<br>rev         | TGATGATGAGAACCCCCCCTTGGATACAGC<br>AGTACGA                       | This<br>paper | 2016 |
| pRS416-<br>XDJ1for    | AGGGGAATTCAAACCTCGTTATTCGAAGTTTTC                               | This<br>paper | 1990 |
| pRS416-<br>XDJ1rev    | AGGGGGATCCGTAGTGTTTTTGGAAGAGATG<br>C                            | This<br>paper | 1991 |
| XDJ1-<br>F151Afor     | ATGGGCAAGAAGCTGAAGGCTGATTAAAGA<br>GACAGGTC                      | This<br>paper | 1992 |
| XDJ1-<br>F151Arev     | GACCTGTCTCTTTAAATCAGCCTTCAGCTTCT<br>TGCCCATG                    | This<br>paper | 1993 |
| XDJ1-<br>I243Afor     | CTGTCAAAGAAGGAAATCGCTACAGTGAACG<br>TGGCTCCG                     | This<br>paper | 1994 |
| XDJ1-<br>I243Arev     | CGGAGCCACGTTCACTGTAGCGATTTCTTCT<br>TTGACAG                      | This<br>paper | 1995 |
